# Supplementary figures and images for: Surface blocking of azolla modified copper electrode for trace determination of phthalic acid esters as the molecular barricades by differential pulse voltammetry: response surface modelling optimized biosensor
Source: Royal Society of Chemistry journal article supplement (doi:10.1039/d1ra04714k), 2021-01-01

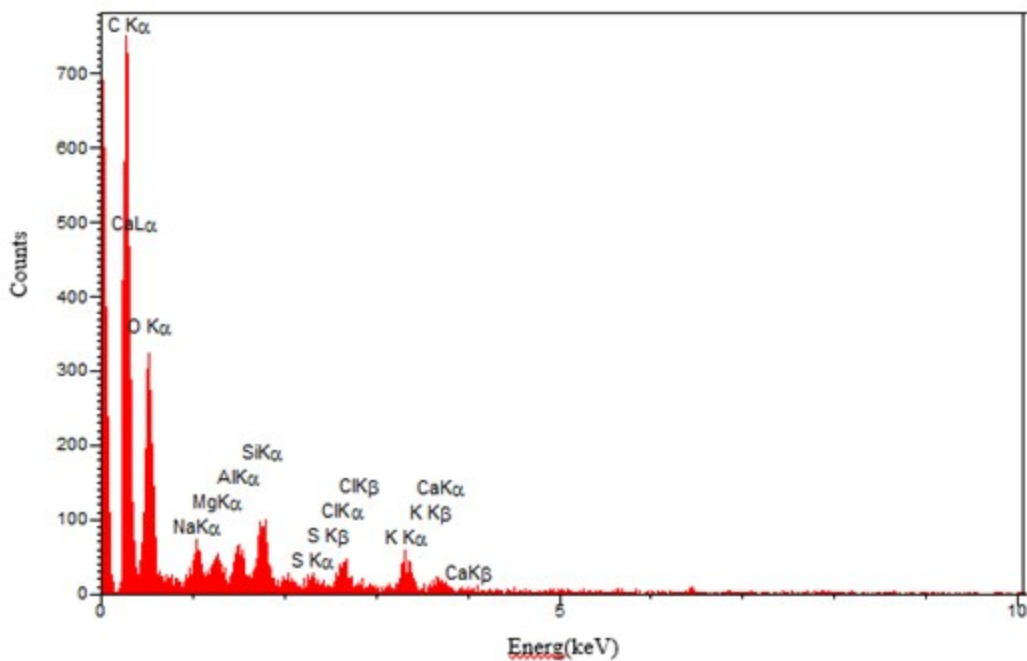

Fig. S1. EDAX spectra of azolla

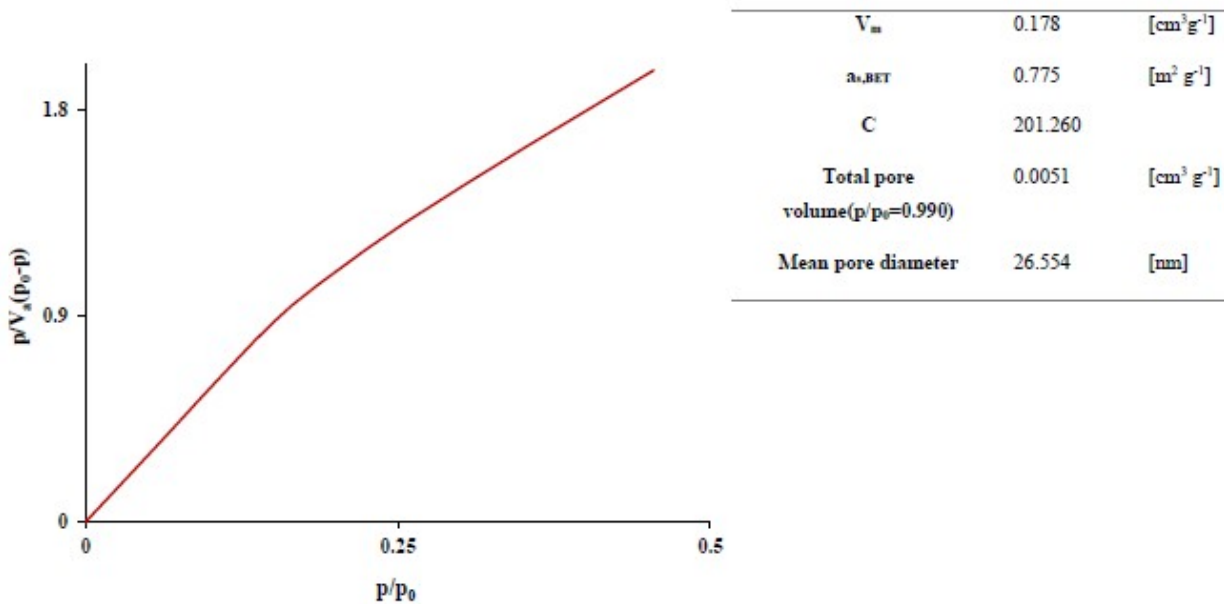

Fig.S2. BET plot of Azolla

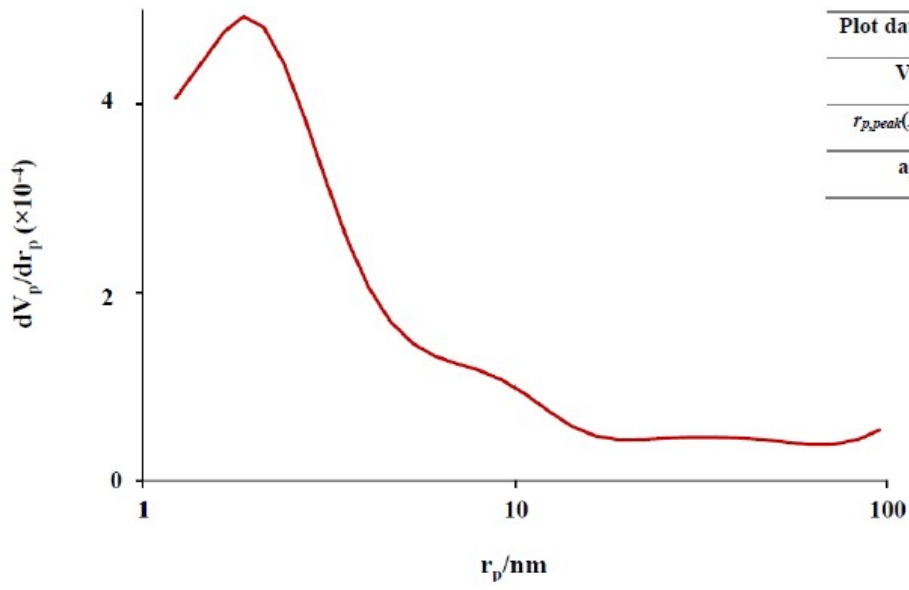

Fig.S3. BJH plot of Azolla

Supplement: d1ra04714k1.pdf [file d1ra04714k1.pdf]
